# Supplementary material for: Changes in Health Insurance Coverage Under the Affordable Care Act: A National Sample of U.S. Adults With Diabetes, 2009 and 2016
Source: Oxford University Press journal article supplement (doi:10.2337/dc17-2524), 2018-02-23
Supplement: dc172524supplementarydata.pdf [file dc172524supplementarydata.pdf]

SUPPLEMENTARY DATA

**Supplementary Figure 1.** Percent of type of private insurance by age among those with diabetes and private insurance. Black bars = 2009; White bars = 2016. Error bars represent 95% confidence intervals. \*p<0.05, 2016 vs. 2009 PPO, Preferred provider organization; HMO/IPA, Health maintenance organization/independent practice organization; POS, Point-of-service

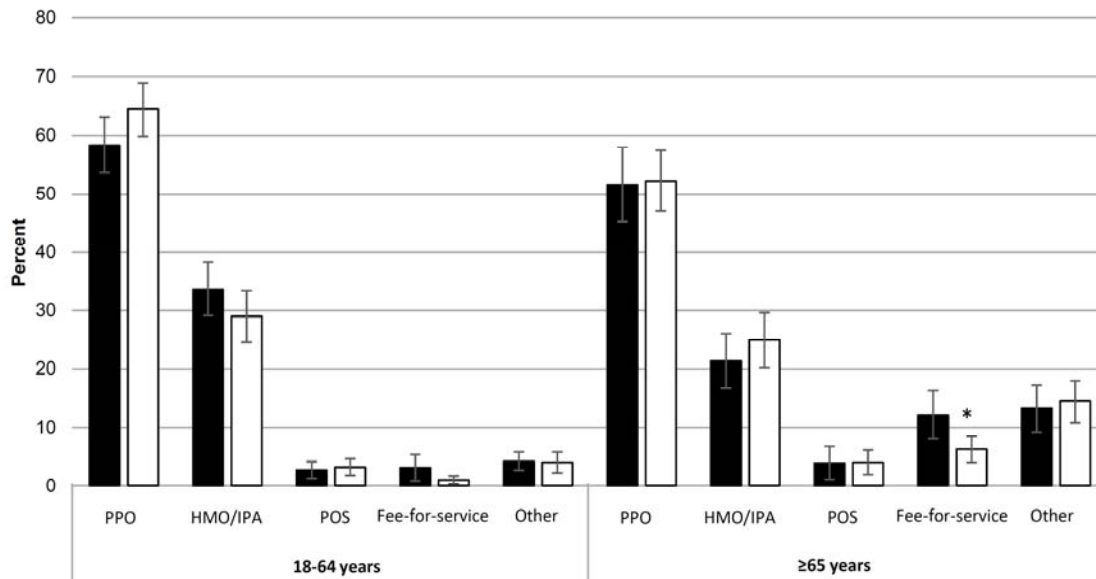

**Supplementary Table 1.** Percent (standard error) of study population with diabetes by age, NHIS 2009 and 2016.

|                       | Participant Characteristics |              |               |              |
|-----------------------|-----------------------------|--------------|---------------|--------------|
|                       | Age 18-64 Years             |              | Age ≥65 Years |              |
|                       | 2009                        | 2016         | 2009          | 2016         |
|                       | N=1581                      | N=1723       | N=1120        | N=1796       |
| <b>Age</b>            |                             |              |               |              |
| 18-39                 | 13.6 (1.18)                 | 15.8 (1.36)  | NA            | NA           |
| 40-49                 | 25.3 (1.61)                 | 19.2 (1.36)* | NA            | NA           |
| 50-59                 | 39.8 (1.74)                 | 39.6 (1.54)  | NA            | NA           |
| 60-64                 | 21.3 (1.30)                 | 25.3 (1.37)† | NA            | NA           |
| 65-74                 | NA                          | NA           | 55.7 (1.82)   | 63.5 (1.46)* |
| ≥75                   | NA                          | NA           | 44.3 (1.82)   | 36.5 (1.46)* |
| <b>Sex</b>            |                             |              |               |              |
| Men                   | 51.9 (1.85)                 | 48.5 (1.61)  | 49.3 (1.86)   | 51.5 (1.55)  |
| Women                 | 48.1 (1.85)                 | 51.1 (1.61)  | 50.7 (1.86)   | 48.5 (1.55)  |
| <b>Race/Ethnicity</b> |                             |              |               |              |
| Non-Hispanic white    | 62.9 (1.59)                 | 57.2 (1.90)* | 69.9 (1.68)   | 67.4 (1.74)  |
| Non-Hispanic black    | 17.0 (1.15)                 | 17.8 (1.34)  | 14.2 (1.13)   | 13.6 (1.23)  |
| Hispanic              | 15.8 (1.13)                 | 19.0 (1.64)  | 10.9 (1.16)   | 12.6 (1.28)  |
| Mexican American      | 10.6 (0.94)                 | 11.7 (1.42)  | 6.5 (0.96)    | 7.5 (1.06)   |

SUPPLEMENTARY DATA

|                                              |             |              |             |              |
|----------------------------------------------|-------------|--------------|-------------|--------------|
| Non-Hispanic Asian                           | 3.6 (0.78)  | 4.0 (0.81)   | 4.0 (0.69)  | 5.3 (0.98)   |
| Non-Hispanic Other                           | 0.8 (0.29)  | 2.0 (0.39)*  | 1.1 (0.49)  | 1.1 (0.25)   |
| <b>Education</b>                             |             |              |             |              |
| Less than high school                        | 19.8 (1.47) | 18.7 (1.39)  | 31.0 (1.68) | 22.5 (1.26)* |
| High school graduate                         | 32.8 (1.69) | 28.2 (1.42)† | 31.4 (1.79) | 29.6 (1.36)  |
| Greater than high school education           | 47.4 (1.85) | 53.2 (1.52)† | 37.5 (1.86) | 47.9 (1.53)* |
| <b>Family income</b>                         |             |              |             |              |
| <\$35,000                                    | 39.4 (1.66) | 38.7 (1.65)  | 53.9 (2.03) | 46.6 (1.68)* |
| \$35,000-\$49,999                            | 14.9 (1.19) | 11.1 (0.98)† | 16.4 (1.38) | 14.6 (1.19)  |
| \$50,000-\$74,999                            | 18.4 (1.24) | 16.4 (1.22)  | 15.0 (1.42) | 17.5 (1.26)  |
| \$75,000-\$99,999                            | 11.2 (1.09) | 10.9 (1.03)  | 7.1 (1.24)  | 9.6 (1.09)   |
| ≥\$100,000                                   | 16.1 (1.50) | 22.9 (1.47)* | 7.5 (1.23)  | 11.8 (1.15)† |
| <b>Marital status</b>                        |             |              |             |              |
| Married or living with partner               | 65.0 (1.53) | 60.9 (1.57)  | 58.3 (1.87) | 55.8 (1.57)  |
| Divorced or separated                        | 16.2 (1.09) | 17.0 (1.16)  | 11.0 (1.04) | 15.4 (1.06)* |
| Widowed                                      | 4.1 (0.57)  | 3.7 (0.49)   | 27.7 (1.59) | 23.3 (1.12)† |
| Never married                                | 14.8 (1.17) | 18.3 (1.29)† | 3.0 (0.47)  | 5.5 (0.60)*  |
| <b>Diabetes duration (years)</b>             |             |              |             |              |
| <5                                           | 40.0 (1.87) | 34.3 (1.64)† | 24.8 (1.53) | 15.6 (1.15)* |
| 5-15                                         | 40.7 (1.62) | 43.3 (1.66)  | 41.9 (1.87) | 40.3 (1.51)  |
| >15                                          | 19.3 (1.22) | 22.4 (1.34)  | 33.3 (1.79) | 44.2 (1.51)* |
| <b>Diabetes medication</b>                   |             |              |             |              |
| Insulin only                                 | 11.8 (1.03) | 12.1 (0.92)  | 12.8 (1.25) | 13.2 (1.00)  |
| Oral only                                    | 55.2 (1.75) | 55.7 (1.56)  | 61.3 (1.75) | 58.2 (1.51)  |
| Insulin and oral                             | 14.1 (1.29) | 16.4 (1.16)  | 13.5 (1.20) | 16.9 (1.09)† |
| None                                         | 18.9 (1.43) | 15.9 (1.15)  | 12.4 (1.20) | 11.7 (1.02)  |
| <b>Hypertension</b>                          |             |              |             |              |
| Yes                                          | 63.7 (1.84) | 67.6 (1.53)  | 81.5 (1.27) | 81.2 (1.20)  |
| No                                           | 36.3 (1.84) | 32.4 (1.53)  | 18.5 (1.27) | 18.8 (1.20)  |
| <b>Heart condition/disease‡</b>              |             |              |             |              |
| Yes                                          | 21.7 (1.57) | 23.1 (1.34)  | 41.2 (2.10) | 37.4 (1.49)  |
| No                                           | 78.3 (1.57) | 76.9 (1.34)  | 58.8 (2.10) | 62.6 (1.49)  |
| <b>Weak or failing kidneys§</b>              |             |              |             |              |
| Yes                                          | 6.5 (0.82)  | 6.3 (0.72)   | 9.7 (1.12)  | 11.3 (0.97)  |
| No                                           | 93.5 (0.82) | 93.7 (0.72)  | 90.3 (1.12) | 88.7 (0.97)  |
| <b>Vision problems  </b>                     |             |              |             |              |
| Yes                                          | 17.1 (1.38) | 21.6 (1.21)† | 19.3 (1.41) | 21.5 (1.22)  |
| No                                           | 82.9 (1.38) | 78.4 (1.21)  | 80.7 (1.41) | 78.5 (1.22)  |
| <b>Visited doctor in past 12 months</b>      |             |              |             |              |
| Yes                                          | 85.2 (1.17) | 83.8 (1.33)  | 92.0 (0.97) | 92.3 (0.76)  |
| No                                           | 14.8 (1.17) | 16.2 (1.33)  | 8.0 (0.97)  | 7.7 (0.76)   |
| <b>Visited eye doctor in past 12 months</b>  |             |              |             |              |
| Yes                                          | 53.4 (1.75) | 53.3 (1.61)  | 66.6 (1.76) | 71.3 (1.46)† |
| No                                           | 46.6 (1.75) | 46.7 (1.61)  | 33.4 (1.76) | 28.7 (1.46)  |
| <b>Visited foot doctor in past 12 months</b> |             |              |             |              |
| Yes                                          | 17.5 (1.46) | 17.7 (1.36)  | 26.9 (1.65) | 30.6 (1.48)  |
| No                                           | 82.5 (1.46) | 82.3 (1.36)  | 73.1 (1.65) | 69.4 (1.48)  |

SUPPLEMENTARY DATA

\* p<0.01, 2016 vs. 2009

† p<0.05, 2016 vs. 2009

‡ Includes coronary heart disease, angina pectoris, heart attack, other heart condition

§ Weak or failing kidneys does not include kidney stones, bladder infections, or incontinence

|| Trouble seeing even with glasses or contacts

**Supplementary Table 2.** Percent (standard error) of study population with diabetes age 18-64 years by health insurance coverage, NHIS 2009 and 2016.

|                                    | Participant Characteristics |             |                     |             |
|------------------------------------|-----------------------------|-------------|---------------------|-------------|
|                                    | Health Insurance            |             | No Health Insurance |             |
|                                    | 2009                        | 2016        | 2009                | 2016        |
|                                    | N=1335                      | N=1560      | N=246               | N=157       |
| <b>Age</b>                         |                             |             |                     |             |
| 18-39                              | 12.6 (1.21)                 | 14.8 (1.38) | 19.4 (3.62)         | 24.8 (4.71) |
| 40-49                              | 25.2 (1.84)                 | 19.2 (1.40) | 25.8 (3.59)         | 20.5 (4.96) |
| 50-59                              | 40.5 (1.93)                 | 40.1 (1.67) | 36.7 (3.69)         | 36.2 (5.43) |
| 60-64                              | 21.8 (1.38)                 | 25.9 (1.49) | 18.1 (3.84)         | 18.5 (3.71) |
| <b>Sex</b>                         |                             |             |                     |             |
| Men                                | 52.0 (2.00)                 | 50.0 (1.73) | 51.8 (3.97)         | 35.2 (5.11) |
| Women                              | 48.0 (2.00)                 | 50.0 (1.73) | 48.2 (3.97)         | 64.8 (5.11) |
| <b>Race/Ethnicity</b>              |                             |             |                     |             |
| Non-Hispanic white                 | 65.0 (1.73)                 | 58.8 (1.94) | 51.2 (4.79)         | 42.8 (6.01) |
| Non-Hispanic black                 | 17.0 (1.29)                 | 18.0 (1.41) | 16.2 (2.64)         | 15.5 (3.61) |
| Hispanic                           | 13.5 (1.15)                 | 17.4 (1.65) | 29.0 (4.12)         | 34.2 (6.00) |
| Mexican American                   | 8.9 (0.96)                  | 10.3 (1.39) | 19.7 (3.29)         | 25.0 (5.69) |
| Non-Hispanic Asian                 | 3.8 (0.91)                  | 4.2 (0.82)  | 2.0 (0.97)          | 1.9 (1.80)  |
| Non-Hispanic Other                 | 0.6 (0.23)                  | 1.7 (0.34)  | 1.7 (1.06)          | 5.6 (1.78)  |
| <b>Education</b>                   |                             |             |                     |             |
| Less than high school              | 16.7 (1.36)                 | 17.8 (1.49) | 37.5 (4.45)         | 25.3 (4.22) |
| High school graduate               | 33.3 (1.83)                 | 27.0 (1.47) | 30.0 (3.77)         | 39.5 (5.70) |
| Greater than high school education | 50.0 (1.98)                 | 55.2 (1.58) | 32.5 (3.99)         | 35.1 (5.11) |
| <b>Family income</b>               |                             |             |                     |             |
| <\$35,000                          | 35.5 (1.71)                 | 37.0 (1.70) | 59.9 (4.41)         | 53.5 (5.96) |
| \$35,000-\$49,999                  | 13.6 (1.21)                 | 10.5 (0.94) | 21.7 (4.11)         | 16.5 (4.31) |
| \$50,000-\$74,999                  | 19.8 (1.43)                 | 16.2 (1.35) | 10.8 (2.28)         | 18.6 (4.01) |
| \$75,000-\$99,999                  | 12.7 (1.23)                 | 11.8 (1.12) | 3.5 (1.49)          | 2.6 (1.71)  |
| ≥\$100,000                         | 18.4 (1.72)                 | 24.4 (1.53) | 4.0 (1.52)          | 8.8 (4.37)  |
| <b>Marital status</b>              |                             |             |                     |             |
| Married or living with partner     | 66.1 (1.68)                 | 61.3 (1.64) | 58.6 (4.84)         | 57.2 (5.06) |
| Divorced or separated              | 15.8 (1.15)                 | 16.9 (1.19) | 18.3 (3.50)         | 19.2 (3.59) |
| Widowed                            | 4.1 (0.62)                  | 4.0 (0.54)  | 4.0 (1.54)          | 1.8 (0.84)  |
| Never married                      | 14.0 (1.22)                 | 17.9 (1.37) | 19.2 (3.53)         | 21.8 (4.35) |
| <b>Diabetes duration (years)</b>   |                             |             |                     |             |
| <5                                 | 38.1 (2.06)                 | 34.1 (1.72) | 50.3 (4.02)         | 36.4 (5.21) |
| 5-15                               | 41.9 (1.79)                 | 42.4 (1.68) | 34.0 (4.06)         | 51.1 (5.63) |
| >15                                | 20.0 (1.33)                 | 23.5 (1.45) | 15.7 (3.62)         | 12.6 (2.95) |
| <b>Diabetes medication</b>         |                             |             |                     |             |

SUPPLEMENTARY DATA

|                                              |             |             |             |             |
|----------------------------------------------|-------------|-------------|-------------|-------------|
| Insulin only                                 | 11.9 (1.11) | 12.4 (1.00) | 11.1 (2.54) | 9.2 (2.31)  |
| Oral only                                    | 55.0 (1.87) | 55.6 (1.65) | 56.2 (4.02) | 55.4 (5.52) |
| Insulin and oral                             | 15.1 (1.43) | 17.3 (1.27) | 8.6 (2.36)  | 8.2 (2.26)  |
| None                                         | 18.0 (1.55) | 14.7 (1.12) | 24.0 (3.28) | 27.2 (5.21) |
| <b>Hypertension</b>                          |             |             |             |             |
| Yes                                          | 65.2 (1.93) | 68.7 (1.62) | 55.3 (4.18) | 58.8 (5.63) |
| No                                           | 34.8 (1.93) | 31.3 (1.62) | 44.7 (4.18) | 41.2 (5.63) |
| <b>Heart condition/disease<sup>‡</sup></b>   |             |             |             |             |
| Yes                                          | 23.2 (1.72) | 24.0 (1.36) | 13.5 (2.61) | 16.1 (4.95) |
| No                                           | 76.8 (1.72) | 76.0 (1.36) | 86.5 (2.61) | 83.9 (4.95) |
| <b>Weak or failing kidneys<sup>§</sup></b>   |             |             |             |             |
| Yes                                          | 6.7 (0.87)  | 6.6 (0.87)  | 5.8 (2.04)  | 4.2 (1.35)  |
| No                                           | 93.3 (0.87) | 93.4 (0.79) | 94.2 (2.04) | 95.8 (1.35) |
| <b>Vision problems<sup>  </sup></b>          |             |             |             |             |
| Yes                                          | 16.5 (1.55) | 21.4 (1.29) | 20.6 (3.20) | 24.1 (5.11) |
| No                                           | 83.5 (1.55) | 78.6 (1.29) | 79.4 (3.20) | 75.9 (5.11) |
| <b>Visited doctor in past 12 months</b>      |             |             |             |             |
| Yes                                          | 87.9 (1.19) | 86.0 (1.29) | 69.6 (3.58) | 64.6 (5.16) |
| No                                           | 12.1 (1.19) | 14.0 (1.29) | 30.4 (3.58) | 35.4 (5.16) |
| <b>Visited eye doctor in past 12 months</b>  |             |             |             |             |
| Yes                                          | 58.5 (1.87) | 55.9 (1.67) | 24.4 (3.18) | 29.1 (4.49) |
| No                                           | 41.5 (1.87) | 44.1 (1.67) | 75.6 (3.18) | 70.9 (4.49) |
| <b>Visited foot doctor in past 12 months</b> |             |             |             |             |
| Yes                                          | 19.4 (1.65) | 18.3 (1.43) | 6.9 (3.07)  | 12.5 (3.44) |
| No                                           | 80.6 (1.65) | 81.7 (1.43) | 93.1 (3.07) | 87.5 (3.44) |

\* p<0.01, 2016 vs. 2009

† p<0.05, 2016 vs. 2009

‡ Includes coronary heart disease, angina pectoris, heart attack, other heart condition

§ Weak or failing kidneys does not include kidney stones, bladder infections, or incontinence

|| Trouble seeing even with glasses or contacts

NA, not applicable

SUPPLEMENTARY DATA

**Supplementary Table 3.** Percent (standard error) of health insurance coverage among adults without diabetes by age, 2009 and 2016

|                                    | Prevalence of Health Insurance Coverage |                 |               |               |
|------------------------------------|-----------------------------------------|-----------------|---------------|---------------|
|                                    | Age 18-64 Years                         |                 | Age ≥65 Years |               |
|                                    | 2009                                    | 2016            | 2009          | 2016          |
|                                    | <b>N=20,639</b>                         | <b>N=22,348</b> | <b>N=4369</b> | <b>N=7091</b> |
| <b>Total</b>                       | 78.3 (0.44)                             | 88.3 (0.38)*    | 99.2 (0.17)   | 99.2 (0.16)   |
| <b>Age</b>                         |                                         |                 |               |               |
| 18-39                              | 72.8 (0.64)                             | 86.1 (0.52)*    | NA            | NA            |
| 40-49                              | 79.6 (0.74)                             | 87.4 (0.68)*    | NA            | NA            |
| 50-59                              | 86.5 (0.71)                             | 92.0 (0.51)*    | NA            | NA            |
| 60-64                              | 88.7 (0.91)                             | 93.5 (0.78)*    | NA            | NA            |
| 65-74                              | NA                                      | NA              | 98.8 (0.29)   | 98.3 (0.25)   |
| ≥75                                | NA                                      | NA              | 99.6 (0.17)   | 99.7 (0.18)   |
| <b>Sex</b>                         |                                         |                 |               |               |
| Men                                | 75.1 (0.66)                             | 86.1 (0.53)*    | 99.4 (0.19)   | 99.2 (0.25)   |
| Women                              | 81.4 (0.55)                             | 90.3 (0.41)*    | 99.0 (0.26)   | 99.3 (0.21)   |
| <b>Race/Ethnicity</b>              |                                         |                 |               |               |
| Non-Hispanic white                 | 83.9 (0.48)                             | 91.8 (0.32)*    | 99.7 (0.13)   | 99.7 (0.09)   |
| Non-Hispanic black                 | 74.5 (1.10)                             | 86.2 (0.92)*    | 97.1 (1.44)   | 98.5 (0.66)   |
| Hispanic                           | 56.1 (1.18)                             | 76.0 (1.27)*    | 97.1 (0.84)   | 96.7 (1.44)   |
| Mexican American                   | 52.5 (1.37)                             | 71.9 (1.79)*    | 97.7 (1.09)   | 98.3 (0.84)   |
| Non-Hispanic Asian                 | 82.6 (1.43)                             | 92.7 (1.05)*    | 94.4 (1.93)   | 99.3 (1.93)   |
| Non-Hispanic Other                 | 61.7 (4.54)                             | 80.7 (2.85)*    | 100.0 (0)     | 96.4 (3.55)   |
| <b>Education</b>                   |                                         |                 |               |               |
| Less than high school              | 56.0 (1.39)                             | 69.6 (1.65)*    | 98.0 (0.59)   | 98.4 (0.61)   |
| High school graduate               | 71.6 (0.89)                             | 84.0 (0.78)*    | 99.8 (0.09)   | 99.5 (0.22)   |
| Greater than high school education | 86.1 (0.44)                             | 92.9 (0.29)*    | 99.2 (0.25)   | 99.3 (0.21)   |
| <b>Family income</b>               |                                         |                 |               |               |
| <\$35,000                          | 60.4 (0.82)                             | 77.2 (0.90)*    | 99.2 (0.21)   | 99.3 (0.21)   |
| \$35,000-\$49,999                  | 72.2 (1.15)                             | 82.2 (1.11)*    | 99.0 (0.49)   | 99.3 (0.47)   |
| \$50,000-\$74,999                  | 82.0 (0.87)                             | 89.7 (0.67)*    | 98.8 (0.71)   | 99.3 (0.53)   |
| \$75,000-\$99,999                  | 90.6 (0.88)                             | 94.7 (0.59)*    | 99.9 (0.09)   | 98.6 (0.86)   |
| ≥\$100,000                         | 94.3 (0.55)                             | 96.9 (0.35)*    | 98.9 (0.75)   | 99.8 (0.24)   |
| <b>Marital status</b>              |                                         |                 |               |               |
| Married or living with partner     | 82.0 (0.52)                             | 89.6 (0.41)*    | 99.3 (0.21)   | 99.4 (0.18)   |
| Divorced or separated              | 74.0 (2.62)                             | 84.4 (0.93)*    | 99.5 (0.23)   | 98.2 (0.78)   |
| Widowed                            | 79.6 (2.62)                             | 87.4 (1.92)†    | 98.8 (0.43)   | 99.8 (0.13)   |
| Never married                      | 71.2 (0.88)                             | 86.7 (0.69)*    | 98.9 (0.57)   | 97.4 (1.29)   |
| <b>Hypertension</b>                |                                         |                 |               |               |
| Yes                                | 84.1 (0.70)                             | 91.3 (0.55)*    | 99.1 (0.25)   | 99.3 (0.21)   |
| No                                 | 76.9 (0.50)                             | 87.5 (0.44)*    | 99.2 (0.23)   | 99.1 (0.26)   |
| <b>Heart condition/disease‡</b>    |                                         |                 |               |               |
| Yes                                | 83.8 (1.20)                             | 89.4 (1.04)*    | 99.7 (0.16)   | 99.9 (0.11)   |
| No                                 | 77.9 (0.46)                             | 88.2 (0.39)*    | 99.0 (0.23)   | 99.0 (0.22)   |
| <b>Weak or failing kidneys§</b>    |                                         |                 |               |               |

SUPPLEMENTARY DATA

|                                              |             |              |             |             |
|----------------------------------------------|-------------|--------------|-------------|-------------|
| Yes                                          | 75.3 (4.63) | 91.0 (2.59)* | 99.4 (0.65) | 98.8 (0.85) |
| No                                           | 78.3 (0.44) | 88.2 (0.38)* | 99.2 (0.18) | 99.3 (0.16) |
| <b>Vision problems<sup>  </sup></b>          |             |              |             |             |
| Yes                                          | 74.8 (1.77) | 88.4 (0.96)* | 99.8 (0.12) | 98.3 (0.74) |
| No                                           | 78.6 (0.44) | 88.3 (0.40)* | 99.1 (0.20) | 99.4 (0.15) |
| <b>Visited doctor in past 12 months</b>      |             |              |             |             |
| Yes                                          | 87.2 (0.40) | 93.6 (0.32)* | 99.4 (0.16) | 99.3 (0.18) |
| No                                           | 63.8 (0.80) | 78.4 (0.73)* | 97.9 (0.73) | 98.6 (0.47) |
| <b>Visited eye doctor in past 12 months</b>  |             |              |             |             |
| Yes                                          | 89.2 (0.51) | 94.8 (0.31)* | 99.4 (0.24) | 99.5 (0.18) |
| No                                           | 73.0 (0.55) | 84.7 (0.51)* | 98.8 (0.27) | 98.8 (0.31) |
| <b>Visited foot doctor in past 12 months</b> |             |              |             |             |
| Yes                                          | 93.2 (0.89) | 96.1 (0.75)† | 99.7 (0.22) | 100.0 (0)   |
| No                                           | 77.6 (0.45) | 87.9 (0.39)* | 99.1 (0.20) | 99.1 (0.19) |

\* p<0.01, 2016 vs. 2009

† p<0.05, 2016 vs. 2009

‡ Includes coronary heart disease, angina pectoris, heart attack, other heart condition

§ Weak or failing kidneys does not include kidney stones, bladder infections, or incontinence

|| Trouble seeing even with glasses or contacts

NA, not applicable

SUPPLEMENTARY DATA

**Supplementary Table 4.** Prevalence [%, (SE)] of health insurance coverage and type of coverage among adults by diabetes status and age, NHIS 2009 and 2016

|                    | Any Type    |              | Medicare    |              | Private     |              | Medicaid/other public |              | Military Benefits |             |
|--------------------|-------------|--------------|-------------|--------------|-------------|--------------|-----------------------|--------------|-------------------|-------------|
|                    | 2009        | 2016         | 2009        | 2016         | 2009        | 2016         | 2009                  | 2016         | 2009              | 2016        |
| <b>Diabetes</b>    |             |              |             |              |             |              |                       |              |                   |             |
| Total              | 90.1 (0.91) | 94.1 (0.60)* | 43.0 (1.36) | 48.8 (1.15)* | 55.5 (1.34) | 51.5 (1.16)† | 16.5 (0.88)           | 19.1 (0.97)† | 6.6 (0.64)        | 6.4 (0.52)  |
| 18-64 years        | 84.7 (1.37) | 90.1 (1.03)* | 13.6 (1.13) | 14.3 (1.10)  | 58.3 (1.80) | 56.3 (1.67)  | 19.4 (1.24)           | 24.3 (1.52)† | 4.0 (0.55)        | 3.3 (0.48)  |
| ≥65 years          | 99.7 (0.19) | 99.5 (0.19)  | 95.2 (0.83) | 94.7 (0.70)  | 50.6 (1.95) | 45.0 (1.64)† | 11.3 (1.11)           | 12.2 (0.98)  | 11.1 (1.45)       | 10.4 (0.98) |
| <b>No Diabetes</b> |             |              |             |              |             |              |                       |              |                   |             |
| Total              | 81.4 (0.36) | 90.2 (0.32)* | 16.2 (0.34) | 18.8 (0.34)* | 64.9 (0.48) | 66.8 (0.52)* | 8.8 (0.26)            | 13.2 (0.39)* | 3.2 (0.14)        | 3.8 (0.19)* |
| 18-64 years        | 78.3 (0.41) | 88.3 (0.38)* | 2.7 (0.13)  | 3.1 (0.14)†  | 65.9 (0.55) | 70.5 (0.55)* | 9.2 (0.29)            | 14.4 (0.44)* | 2.6 (0.15)        | 2.9 (0.18)  |
| ≥65 years          | 99.2 (0.17) | 99.2 (0.16)  | 94.6 (0.44) | 94.4 (0.39)  | 58.6 (1.02) | 49.3 (0.98)* | 6.4 (0.44)            | 7.6 (0.47)   | 7.0 (0.44)        | 8.0 (0.43)  |

Type of health insurance is not mutually exclusive

\*p<0.01

†p<0.05

**Supplementary Table 5.** Prevalence of type of private insurance by age and diabetes status among those with private insurance, NHIS 2009 and 2016

|                    | HMO/IPA     |             | PPO         |             | POS        |             | Fee-for-service |             | Other       |             |
|--------------------|-------------|-------------|-------------|-------------|------------|-------------|-----------------|-------------|-------------|-------------|
|                    | 2009        | 2016        | 2009        | 2016        | 2009       | 2016        | 2009            | 2016        | 2009        | 2016        |
| <b>Diabetes</b>    |             |             |             |             |            |             |                 |             |             |             |
| Total              | 29.9 (1.81) | 27.5 (1.74) | 56.3 (1.88) | 60.1 (1.78) | 3.1 (0.66) | 3.5 (0.58)  | 5.9 (1.00)      | 2.7 (0.48)* | 6.9 (0.83)  | 7.6 (0.91)  |
| 18-64 years        | 33.7 (2.34) | 29.0 (2.32) | 58.3 (2.40) | 64.4 (2.32) | 2.7 (0.72) | 3.2 (0.71)  | 3.1 (1.11)      | 0.87 (0.37) | 4.2 (0.77)  | 4.0 (0.90)  |
| ≥65 years          | 21.3 (2.43) | 24.9 (2.40) | 51.6 (3.25) | 52.2 (2.64) | 3.9 (1.43) | 4.0 (1.05)  | 12.1 (2.08)     | 6.2 (1.12)† | 13.2 (2.09) | 14.4 (1.81) |
| <b>No Diabetes</b> |             |             |             |             |            |             |                 |             |             |             |
| Total              | 27.8 (0.63) | 27.5 (0.85) | 63.1 (0.68) | 63.3 (0.85) | 3.5 (0.22) | 3.4 (0.26)  | 2.6 (0.21)      | 1.8 (0.17)* | 4.6 (0.27)  | 5.0 (0.30)  |
| 18-64 years        | 28.9 (0.67) | 28.3 (0.88) | 64.6 (0.71) | 64.7 (0.89) | 3.3 (0.22) | 3.5 (0.27)  | 1.8 (0.20)      | 0.9 (0.12)* | 3.1 (0.22)  | 3.7 (0.27)  |
| ≥65 years          | 19.1 (1.25) | 22.2 (1.35) | 52.3 (1.66) | 53.1 (1.51) | 5.0 (0.76) | 3.2 (0.45)† | 8.9 (0.87)      | 8.0 (0.86)  | 15.6 (1.35) | 14.6 (1.06) |

\*p<0.01

†p<0.05

SUPPLEMENTARY DATA

**Supplementary Table 6.** Percent (standard error) of income spent on medical costs in past year among adults without diabetes, 2009 and 2016

|                                      | Family Medical Costs <sup>†</sup> |                 |               |               | Private Insurance Premiums <sup>‡</sup> |               |               |               |
|--------------------------------------|-----------------------------------|-----------------|---------------|---------------|-----------------------------------------|---------------|---------------|---------------|
|                                      | Age 18-64 years                   |                 | Age ≥65 years |               | Age 18-64 years                         |               | Age ≥65 years |               |
|                                      | 2009                              | 2016            | 2009          | 2016          | 2009                                    | 2016          | 2009          | 2016          |
|                                      | <b>N=19,409</b>                   | <b>N=20,460</b> | <b>N=3831</b> | <b>N=5905</b> | <b>N=7460</b>                           | <b>N=1407</b> | <b>N=8899</b> | <b>N=2026</b> |
| Overall                              | 2.8 (0.05)                        | 2.5 (0.04)*     | 4.0 (0.11)    | 3.1 (0.07)*   | 3.8 (0.06)                              | 4.7 (0.10)    | 5.2 (0.24)    | 4.8 (0.12)    |
| <b>Family Income<sup>§</sup>, \$</b> |                                   |                 |               |               |                                         |               |               |               |
| 0-34,999                             | 4.5 (0.13)                        | 3.8 (0.12)*     | 5.8 (0.20)    | 4.8 (0.17)*   | 8.5 (0.04)                              | 9.6 (0.37)    | 10.1 (0.24)   | 11.1 (0.57)   |
| 35,000-49,999                        | 2.9 (0.09)                        | 2.5 (0.10)*     | 3.2 (0.17)    | 2.8 (0.15)    | 5.1 (0.25)                              | 5.3 (0.28)    | 4.9 (0.34)    | 5.1 (0.28)    |
| 50,000-74,999                        | 2.2 (0.06)                        | 2.2 (0.06)      | 2.3 (0.12)    | 2.5 (0.10)    | 3.8 (0.11)                              | 4.8 (0.19)    | 3.5 (0.29)    | 4.0 (0.23)    |
| 75,000-99,999                        | 1.7 (0.05)                        | 1.9 (0.05)*     | 2.0 (0.13)    | 1.8 (0.08)    | 2.8 (0.07)                              | 4.1 (0.11)    | 2.4 (0.22)    | 2.6 (0.18)    |
| ≥100,000                             | 1.7 (0.03)                        | 1.9 (0.03)      | 1.8 (0.10)    | 1.9 (0.07)    | 3.0 (0.09)                              | 4.0 (0.13)    | 2.1 (0.29)    | 3.3 (0.19)    |

\*p<0.05 for 2016 vs. 2009 within each age strata.

<sup>†</sup> Family medical costs are the mid-point of the following categories: \$0, <\$500, \$500-\$1,999, \$2,000-\$2,999, \$3,000-\$4,999, ≥\$5,000. Values ≥\$5,000 are coded as \$5,000. Family medical costs include out-of-pocket costs for medical and dental care and exclude health insurance premiums, over-the-counter drugs, and reimbursed costs.

<sup>‡</sup> Among those with private insurance. Private insurance premiums are median costs. Values ≥\$20,000 are coded as \$20,000.

<sup>§</sup> Denominators are the mid-point of family income category.
